# Supplementary material
Source: publisher site journal article supplement (https://www.dovepress.com/get_supplementary_file.php?f=439725.docx)
Supplement: Supplementary file 1 [file get_supplementary_file.php]

**Supplementary Table S1 CHEERS Checklist detail**

|  | **Item** | **Guidance for Reporting** | **Reported in section** | **Punekar et al. (2019)** | **Skor** |
| --- | --- | --- | --- | --- | --- |
| **Title** | | | | |  |
| Title | 1 | Identify the study as an economic evaluation and specify the interventions being compared. | Title, page 1 | Improving access to antiretrovirals in China: economic analyses of dolutegravir in HIV-1 patients | 1 |
| **ABSTRACT** | | | | |  |
| Abstract | 2 | Provide a structured summary that highlights context, key methods, results and alternative analyses | Abstract, page 1 | Require to guidance for reporting | 1 |
| **INTRODUCTION** | | | | |  |
| Background and objectives | 3 | Give the context for the study, the study question and its practical relevance for decision making in policy or practice | Introduction, page 2 | Even prevalence of HIV in China is low (0,037%) but Chinese government needs to make significant further progress in effective management of HIV. DTG is a second generation INSTIs that received regulatory approval in China in 2015. DTG has demonstrated superiority to EFV on efficacy and rates of discontinuations. The objectives was to assess cost-effectiveness in PLHIV in China | 1 |
| **METHODS** | | | | |  |
| Health economic analysis plan | 4 | Indicate whether a health economic analysis plan was developed and where available. | Methods, | Yes, a health economic analysis plan was developed for this study. | 1 |
| Study population | 5 | Describe characteristics of the study population (such as age range, demographics, socioeconomic, or clinical characteristics). | Methods, | Not describe in detail | 0.5 |
| Setting and location | 6 | Provide relevant contextual information that may influence findings. | Methods, treatment naïve setting | The study conducted in China | 1 |
| Comparators | 7 | Describe the interventions or strategies being compared and why chosen | Methods, treatmen naïve setting | Intervention was compared with EFV added to TDF/3TC (EFV/TDF/3TC) | 1 |
| Perspective | 8 | State the perspective(s) adopted by the study and why chosen | Methods, model design | Societal perspective | 1 |
| Time horizon | 9 | State the time horizon for the study and why appropriate. | Methods, Indirect costs | The study outcomes assessed at 5-years and life-time horizons | 1 |
| Discount rate | 10 | Report the discount rate(s) and reason chosen. | Methods, Indirect costs | Discount rate 2,3% | 1 |
| Selection of outcomes | 11 | Describe what outcomes were used as the measure(s) of benefit(s) and harm(s). | Methods, economic analyses | Cost per responder and cost per QALY | 1 |
| Measurement of outcomes | 12 | Describe how outcomes used to capture benefit(s) and harm(s) were measured. | Methods, | The CEA typically includes detailed information about the incremental costs and the incremental health effects. the results of CEA are often expressed as an incremental efficacy in quality adjusted life years (QALYs) and incremental cost. The ICER compared DTG+TDF/3TC with EFV+TDF/3TC in first failure patients. Additionally include willingness to pay parameter | 1 |
| Valuation of outcomes | 13 | Describe the population and methods used to measure and value outcomes. | Methods, model design | The population used in this study is patients in treatment naïve HIV-1 infected and individual experiencing first line failure patients.  Treatment efficacy defined as viral suppression and leading to increase in CD4+ count. | 0.5 |
| Measurement and valuation of resources and costs | 14 | Describe how costs were valued. | Methods, page 4 | Cost valued from ART related cost, HIV management costs, and indirect cost | 1 |
| Currency, price date, and conversion | 15 | Report the dates of the estimated resource quantities and unit costs, plus the currency and year of conversion. | Methods, indirect cost | ART costs are presented in Renminbi (RMB) and inflated to 2017 values. | 1 |
| Rationale and description of model | 16 | If modelling is used, describe in detail and why used. Report if the model is publicly available and where it can be accessed. | Methods, model design | The model framework was a dynamic Markov model. | 1 |
| Analytics and assumptions | 17 | Describe any methods for analysing or statistically transforming data, any extrapolation methods, and approaches for validating any model used. | Methods, | The study conducted one-way sensitivity analysis on multiple parameters and probabilistic sensitivity analysis. | 0.5 |
| Characterizing heterogeneity | 18 | Describe any methods used for estimating how the results of the study vary for sub-groups |  | N/A | 0 |
| Characterizing distributional effects | 19 | Describe how impacts are distributed across different individuals or adjustments made to reflect priority populations | Methods, | The study did not explicitly describe how impacts were distributed across different individuals or adjustments made to reflect priority populations. | 0 |
| Characterizing uncertainty | 20 | Describe methods to characterize any sources of uncertainty in the analysis | Methods, economic analyses | The study used one-way sensitivity analysis on multiple parameters and probabilistic sensitivity analysis. | 1 |
| Approach to engagement with patients and others affected by the study | 21 | Describe any approaches to engage patients or service recipients, the general public, communities, or stakeholders (e.g., clinicians or payers) in the design of the study. | Methods, | The provided information does not explicitly mention any engagement with patients, the general public, communities, or stakeholders in the design of the study. | n/a |
| **RESULTS** | | | | |  |
| Study parameters | 22 | Report all analytic inputs (e.g., values, ranges, references) including uncertainty or distributional assumptions. | Results, page 5, table 3, figure 2 | All study parameters that describe in methods was complete discussed in results | 1 |
| Summary of main results | 23 | Report the mean values for the main categories of costs and outcomes of interest and summarise them in the most appropriate overall measure. | Results, end of paragraph on results | In population of treatment-naïve setting, the ICER result was 0,006 incremental QALY with cost savings of RMB 467 and the willingness to pay threshold of RMB 100,000 was 98.2%  In population of first-line failure setting, mean QALYs of DTG+TDF/3TC patients was 4.224 with total cost is lower than LPV/r+TDF/3TC and willingness to pay had 100% probability of being cost-effective. | 1 |
| Effect of uncertainty | 24 | Describe how uncertainty about analytic judgments, inputs, or projections affect findings. Report the effect of choice of discount rate and time horizon, if applicable | Results, | The study described how uncertainty about analytic judgments, inputs, or projections could affect the findings. Sensitivity analyses were conducted to explore the impact of varying assumptions. | 1 |
| Effect of engagement with patients and others affected by the study | 25 | Report on any difference patient/service recipient, general public, community, or stakeholder involvement made to the approach or findings of the study | Not reported | This study funded by the National Institute of Allergy and Infectious Diseases and Steve and Deborah Gorlin Massachusetts General Hospital Research Scholar. The funding sources not influence in the design, analysis or interpretation of the study or in the decision. | n/a |
| **DISCUSSION** | | | | |  |
| Study findings, limitations, generalizability, and current knowledge | 26 | Report key findings, limitations, ethical or equity considerations not captured, and how these could impact patients, policy, or practice. | Discussion | This finding is consistent with the clinical profile of DTG which has shown superiority to both alternative subjects. The total cost of HIV management was lower for the DTG based regimen. Sensitivity analyses likely stable for the results. The limitation is ART efficacy estimated from RCT of real-world results, its possible different in China. | 1 |
| **OTHER RELEVANT INFORMATION** | | | | |  |
| Source of funding | 27 | Describe how the study was funded and any role of the funder in the identification, design, conduct, and reporting of the analysis | End of manuscript | Funded by ViiV healthcare | 1 |
| Conflict of interest | 28 | Report authors conflicts of interest according to journal or International Committee of Medical Journal Editors requirements. | End of manuscript | YSP is an employee of ViiV and NG was an employee of GlaxoSmithKline at the time of this study and both hold stocks in GlaxoSmithKline. GT is employed by Purple Squirrel Economics and received payment from ViiV for consultancy during the conduct of this study. JP and TH are employees of Adelphi Real World and received payment from ViiV for consultancy during the conduct of this study. BY has recently joined ViiV and has received grants/honorarium from GSK/ViiV to speak on behalf of the company. | 1 |

|  | **Item** | **Guidance for Reporting** | **Reported in section** | **Phillips et al. (2017)** | **Skor** |
| --- | --- | --- | --- | --- | --- |
| **Title** | | | | |  |
| Title | 1 | Identify the study as an economic evaluation and specify the interventions being compared. | Title, Page 1 | Cost-effectiveness of public-health policy options in the presence of pretreatment NNRTI drug resistance in sub-Saharan Africa: a modelling study | 1 |
|  | | | | |  |
| Abstract | 2 | Provide a structured summary that highlights context, key methods, results and alternative analyses | Abstract, page 1 | Require to guidance for reporting | 1 |
|  | | | | |  |
| Background and objectives | 3 | Give the context for the study, the study question and its practical relevance for decision making in policy or practice | Introduction, page 1 | In several countries of southern Africa, more than 85% people have viral loads less than 1000 copies/mL. however, resistance to efavirenz in people initiating ART has been increasing with prevalence of more than 10%. This study addresses the policy problem of how low-middle income countries in sub-Saharan Africa can respond to increasing prevalence of resistance. The objective is making consideration to WHO guidelines group develop guideline for the public health response to the resistance | 1 |
| **METHODS** | | | | |  |
| Health economic analysis plan | 4 | Indicate whether a health economic analysis plan was developed and where available. | Methods, modelling | Yes, a health economic analysis plan was developed for this study.  The study used the Cost-Effectiveness of Preventing AIDS Complications-International | 1 |
| Study population | 5 | Describe characteristics of the study population (such as age range, demographics, socioeconomic, or clinical characteristics). | Methods, modelling, appendix | Not describe in detail.  Population in sub-Saharan Africa | 0.5 |
| Setting and location | 6 | Provide relevant contextual information that may influence findings. | Methods, modelling paragraph 1 | The study conducted in sub-Saharan Africa | 1 |
| Comparators | 7 | Describe the interventions or strategies being compared and why chosen | Methods, modelling paragraph 1 | Intervention was compared with efavirenz-regimen | 1 |
| Perspective | 8 | State the perspective(s) adopted by the study and why chosen | Methods, cost-effectiveness analysis paragraph 1 | This study adopted health-sector perspective | 1 |
| Time horizon | 9 | State the time horizon for the study and why appropriate. | Methods, cost-effectiveness analysis paragraph 1 | The study outcomes assessed at 20 years | 1 |
| Discount rate | 10 | Report the discount rate(s) and reason chosen. | Methods, cost-effectiveness analysis paragraph 1 | Discount rate 3% per year in 2016 | 1 |
| Selection of outcomes | 11 | Describe what outcomes were used as the measure(s) of benefit(s) and harm(s). | Methods, cost-effectiveness analysis paragraph 2 | The study compared predicted outcomes of the effectiveness (measured as DALY) and the cost-effectiveness  the outcomes expressed as net DALYs, it is calculated as the sum of DALYs plus the ration of costs to the cost-effectiveness threshold. | 1 |
| Measurement of outcomes | 12 | Describe how outcomes used to capture benefit(s) and harm(s) were measured. | Methods, cost-effectiveness analysis paragraph 2 | The difference in net DALYs between adoption of a strategy and policy no change (incremental net DALYs) shows the net effect of the strategy on population burden of disease. The strategy with the lowest net DALYs incurred overall Is deemed cost-effective | 1 |
| Valuation of outcomes | 13 | Describe the population and methods used to measure and value outcomes. | Methods, modelling paragraph 1 | viral load, CD4 cell count, occurrence of WHO stage 3 and 4 HIV disease conditions, clinic attendance and drop-out, use of specific antiretroviral drugs, presence of specific resistance mutations, adherence to ART, and toxic effects of ART. Full details are provided in | 0.5 |
| Measurement and valuation of resources and costs | 14 | Describe how costs were valued. | Methods, appendix table S17 | The study derived ART regimen costs from HIV drug prices in resources-limited countries published by CHAI and WHO | 1 |
| Currency, price date, and conversion | 15 | Report the dates of the estimated resource quantities and unit costs, plus the currency and year of conversion. | Methods, modelling paragraph 1, appendix | All costs are reported in 2016 US dollars | 1 |
| Rationale and description of model | 16 | If modelling is used, describe in detail and why used. Report if the model is publicly available and where it can be accessed. | Methods, cost-effectiveness analysis, appendix | The HIV synthesis transmission model is an individual-based stochastic model of heterosexual transmission, progression and treatment of HIV infection within a southern African | 1 |
| Analytics and assumptions | 17 | Describe any methods for analysing or statistically transforming data, any extrapolation methods, and approaches for validating any model used. | Methods, modelling paragraph 5 | This study concludes sensitivity analysis to considered a worst plausible case scenario | 1 |
| Characterizing heterogeneity | 18 | Describe any methods used for estimating how the results of the study vary for sub-groups | Methods, modelling, appendix | Each of these model runs reflects a different potential programmatic situation which we call a  setting scenario | 1 |
| Characterizing distributional effects | 19 | Describe how impacts are distributed across different individuals or adjustments made to reflect priority populations | Methods, | The study did not explicitly describe how impacts were distributed across different individuals or adjustments made to reflect priority populations. | 1 |
| Characterizing uncertainty | 20 | Describe methods to characterize any sources of uncertainty in the analysis | Methods, | Not describe in detail | 0.5 |
| Approach to engagement with patients and others affected by the study | 21 | Describe any approaches to engage patients or service recipients, the general public, communities, or stakeholders (e.g., clinicians or payers) in the design of the study. | Methods, | The provided information does not explicitly mention any engagement with patients, the general public, communities, or stakeholders in the design of the study. | n/a |
| **RESULTS** | | | | |  |
| Study parameters | 22 | Report all analytic inputs (e.g., values, ranges, references) including uncertainty or distributional assumptions. | Results, figure | All study parameters that describe in methods was complete discussed in results | 1 |
| Summary of main results | 23 | Report the mean values for the main categories of costs and outcomes of interest and summarise them in the most appropriate overall measure. | Results, paragraph 2, supplementary table 3 | the policy of using dolutegravir in all ART initiators is predicted to avert the most DALYs and has the lowest cost. The mean in DALYs averted per year was 50669 and the incremental net DALYs was -50,669 for policy option of using dolutegravir in all ART initiator.  Incremental net DALYs shows the reduction in population burden of disease, measured in DALYs, per year of each policy compared to no change.  The policy which reduces population burden of disease the most is cost effective. | 1 |
| Effect of uncertainty | 24 | Describe how uncertainty about analytic judgments, inputs, or projections affect findings. Report the effect of choice of discount rate and time horizon, if applicable | Results, end paragraph | The study described how uncertainty about analytic judgments, inputs, or projections could affect the findings. Sensitivity analyses were conducted to explore the impact of varying assumptions. | 1 |
| Effect of engagement with patients and others affected by the study | 25 | Report on any difference patient/service recipient, general public, community, or stakeholder involvement made to the approach or findings of the study | Not reported | n/a | n/a |
| **DISCUSSION** | | | | |  |
| Study findings, limitations, generalizability, and current knowledge | 26 | Report key findings, limitations, ethical or equity considerations not captured, and how these could impact patients, policy, or practice. | Discussion | A transition from efavirenz-containing HIV drug resistance. Geneva: World Health Organization, 2017. first-line regimens to generic dolutegravir-containing regimens is predicted to be effective and cost-effective in low-income settings in sub-Saharan Africa at any level of NNRTI pretreatment drug resistance. | 1 |
| **OTHER RELEVANT INFORMATION** | | | | |  |
| Source of funding | 27 | Describe how the study was funded and any role of the funder in the identification, design, conduct, and reporting of the analysis | End of manuscript | Funding resources of this study declare from Gilead funded meetings, Gilead sciences, MSD, ViiV Healthcare and Janssen, Danish national research foundation, Merck sharp & Dohme, Gilead | 1 |
| Conflict of interest | 28 | Report authors conflicts of interest according to journal or International Committee of Medical Journal Editors requirements. | End of manuscript | The authors have no competing interest to declare | 1 |

|  | **Item** | **Guidance for Reporting** | **Reported in section** | **Phillips et al. (2018)** | **Skor** |
| --- | --- | --- | --- | --- | --- |
| **Title** | | | | |  |
| Title | 1 | Identify the study as an economic evaluation and specify the interventions being compared. | Title, page 1 | Risks and benefits of dolutegravir-based antiretroviral drug regimens in sub-Saharan Africa: a modelling study | 1 |
| **ABSTRACT** | | | | |  |
| Abstract | 2 | Provide a structured summary that highlights context, key methods, results and alternative analyses | Abstract, page 1 | Require to guidance for reporting | 1 |
| **INTRODUCTION** | | | | |  |
| Background and objectives | 3 | Give the context for the study, the study question and its practical relevance for decision making in policy or practice | Introduction, page 2 | The previous study reported risks and benefit to switch efavirenz-regimen to dolutegravir-regimen. However, the evaluation did not consider the specific question addressed in a 2019 WHO antiretroviral guidelines update. In this study provide to updated modelling results. | 1 |
| **METHODS** | | | | |  |
| Health economic analysis plan | 4 | Indicate whether a health economic analysis plan was developed and where available. | Methods, | Yes, a health economic analysis plan was developed for this study. | 1 |
| Study population | 5 | Describe characteristics of the study population (such as age range, demographics, socioeconomic, or clinical characteristics). | Methods, | Adults, women | 0.5 |
| Setting and location | 6 | Provide relevant contextual information that may influence findings. | Methods, modelling approach paragraph 1 | The study conducted in sub-Saharan Africa | 1 |
| Comparators | 7 | Describe the interventions or strategies being compared and why chosen | Methods, | Intervention was compared with tenofovir/lamivudine/efavirenz | 1 |
| Perspective | 8 | State the perspective(s) adopted by the study and why chosen | Methods, Policies compared DALYs and net DALYs | Healthcare perspective | 1 |
| Time horizon | 9 | State the time horizon for the study and why appropriate. | Methods, Policies compared DALYs and net DALYs | The study uses 20-year time horizon | 1 |
| Discount rate | 10 | Report the discount rate(s) and reason chosen. | Methods, Policies compared DALYs and net DALYs | Discount rate 3% per annum | 1 |
| Selection of outcomes | 11 | Describe what outcomes were used as the measure(s) of benefit(s) and harm(s). | Methods, Policies compared DALYs and net DALYs | The outcomes were DALYs and Net DALYs | 1 |
| Measurement of outcomes | 12 | Describe how outcomes used to capture benefit(s) and harm(s) were measured. | Methods, model outcomes paragraph 1 | Health related events, costs, DALYs and net DALYs are relevant for country with a population size of around 10 million adults in 2018 | 1 |
| Valuation of outcomes | 13 | Describe the population and methods used to measure and value outcomes. | Methods, model description paragraph 1 | Valuation of outcomes measured based on model, that generates a population individually tracked every 3 months. HIV are tracked in terms of viral load, CD4 cell count, occurrence of WHO stage 3 and 4 condition etc. | 0.5 |
| Measurement and valuation of resources and costs | 14 | Describe how costs were valued. | Methods, page 4 | The study derived ART regimen costs from HIV drug prices in resources-limited countries published by CHAI and WHO.  Health opportunity costs are calculated using country cost-effectiveness threshold, which represent the health gains that could be generated by alternative uses of resources  This study calculated net DALY as DALY plus costs divided by the cost-effectiveness threshold. | 1 |
| Currency, price date, and conversion | 15 | Report the dates of the estimated resource quantities and unit costs, plus the currency and year of conversion. | Methods, model outcomes, appendix | Costs are in US$ | 0.5 |
| Rationale and description of model | 16 | If modelling is used, describe in detail and why used. Report if the model is publicly available and where it can be accessed. | Methods, model description, appendix | This modelling study used the HIV synthesis model | 1 |
| Analytics and assumptions | 17 | Describe any methods for analysing or statistically transforming data, any extrapolation methods, and approaches for validating any model used. | Methods, | The study conducted sensitivity analysis but not describe in detail | 1 |
| Characterizing heterogeneity | 18 | Describe any methods used for estimating how the results of the study vary for sub-groups | Methods, | The study conducted sensitivity analysis | 1 |
| Characterizing distributional effects | 19 | Describe how impacts are distributed across different individuals or adjustments made to reflect priority populations | Methods, appendix | The distribution of adherence levels was primarily determined by the adherence levels required for the model outputs to mimic observed data. This includes data on rates of resistance development and virologic failure and also data on the proportion of patients at first virologic failure who have no resistance mutations present. | 1 |
| Characterizing uncertainty | 20 | Describe methods to characterize any sources of uncertainty in the analysis | Methods, economic analyses | The study used sensitivity analysis to assessed robustness of the model and uncertainty | 0.5 |
| Approach to engagement with patients and others affected by the study | 21 | Describe any approaches to engage patients or service recipients, the general public, communities, or stakeholders (e.g., clinicians or payers) in the design of the study. | Methods, | The provided information does not explicitly mention any engagement with patients, the general public, communities, or stakeholders in the design of the study. | n/a |
| **RESULTS** | | | | |  |
| Study parameters | 22 | Report all analytic inputs (e.g., values, ranges, references) including uncertainty or distributional assumptions. | Results, paragraph 2, table | All study parameters that describe in methods was complete discussed in results | 1 |
| Summary of main results | 23 | Report the mean values for the main categories of costs and outcomes of interest and summarise them in the most appropriate overall measure. | Results, paragraph 5 | DALYs averted and cost with tenofovir/lamivudine/dolutegravir for all policy better than tenofovir/lamivudine/efavirenz.  tenofovir/lamivudine/dolutegravir was cost effective in 83% of setting scenario | 1 |
| Effect of uncertainty | 24 | Describe how uncertainty about analytic judgments, inputs, or projections affect findings. Report the effect of choice of discount rate and time horizon, if applicable | Results, | The study described how uncertainty about analytic judgments, inputs, or projections could affect the findings. Sensitivity analyses were conducted to explore the impact of varying assumptions. | 1 |
| Effect of engagement with patients and others affected by the study | 25 | Report on any difference patient/service recipient, general public, community, or stakeholder involvement made to the approach or findings of the study | Not reported | n/a | n/a |
| **DISCUSSION** | | | | |  |
| Study findings, limitations, generalizability, and current knowledge | 26 | Report key findings, limitations, ethical or equity considerations not captured, and how these could impact patients, policy, or practice. | Discussion | Switching to tenofovir/lamivudine/dolutegravir for all ART initiator was predicted to bring benefit, dolutegravir resistance is predicted to present in 6.7% of people over 20 years compared to sub group on this study (people with dependent on viral suppression) and these findings were consistent in several sensitivity analyses.  The limitation of this study is over a long-time horizon for cost-effectiveness analysis. | 1 |
| **OTHER RELEVANT INFORMATION** | | | | |  |
| Source of funding | 27 | Describe how the study was funded and any role of the funder in the identification, design, conduct, and reporting of the analysis | End of manuscript | DK is a consultant to ViiV Healthcare, Gilead Sciences, and Merck,  and reports research funding from all three companies, and Janssen and  AbbVie. JM reports grant support from the Bill & Melinda Gates  Foundation, USAID, Brigham Women’s Hospital/AIDS Clinical Trials  Group (ACTG) to the University of Pittsburgh Virology Support  Laboratory, Janssen Pharmaceuticals, and Gilead Sciences, personal fees  from University of Pittsburgh and Gilead Sciences, and share options in  Co-Crystal Pharma, Inc. FV reports grants, personal fees and  non-financial support from Viiv Healthcare and Gilead Sciences,  personal fees and non-financial support from Mylan and Roche,  personal fees from Adcock Ingram, Aspen Healthcare, J&J, and Merck,  and grants from the Bill and Melinda Gates Foundation, Unitaid,  USAID, and South African MRC, outside the submitted work. AP is a  member of advisory boards for Gilead Sciences, ViiV Healthcare, Merck,  and Jannsen, has spoken at non-commercial symposia funded by Gilead  Sciences, ViiV Healthcare, Merck, and Jannsen, and is chair of the  antiretrovirals section of the European AIDS Clinical Society guidelines.  ADL reports research grants from ViiV Healthcare, Merck, and Gilead  Sciences (Fellowship programme), and paid consultancies with ViiV  Healthcare, Merck, Janssen, AbbVie, and Gilead Sciences. AW reports  being on advisory boards for and grants from Janssen, Merck, Gilead  Sciences, ViiV Healthcare, and CLJI. AC reports institutional  unrestricted educational grants from ViiV Healthcare, AbbVie, BMS,  MSD, and Gilead Sciences. | 1 |
| Conflict of interest | 28 | Report authors conflicts of interest according to journal or International Committee of Medical Journal Editors requirements. | End of manuscript | The authors have no competing interest to declare | 1 |

|  | **Item** | **Guidance for Reporting** | **Reported in section** | **Phillips et al. (2020)** | **Skor** |
| --- | --- | --- | --- | --- | --- |
| **Title** | | | | |  |
| Title | 1 | Identify the study as an economic evaluation and specify the interventions being compared. | Title, page 1 | Updated assessment of risks and benefits of dolutegravir versus efavirenz in new antiretroviral treatment initiators in sub-Saharan Africa: modelling to inform treatment guideline | 1 |
| **ABSTRACT** | | | | |  |
| Abstract | 2 | Provide a structured summary that highlights context, key methods, results and alternative analyses | Abstract, page 1 | Require to guidance for reporting | 1 |
| **INTRODUCTION** | | | | |  |
| Background and objectives | 3 | Give the context for the study, the study question and its practical relevance for decision making in policy or practice | Introduction, page 2 | The previous study reported switching to dolutegravir-regimen however, did not consider the specific question addressed in a 2019 WHO antiretroviral guidelines updated. The study provides updated modelling to response for WHO. | 1 |
| **METHODS** | | | | |  |
| Health economic analysis plan | 4 | Indicate whether a health economic analysis plan was developed and where available. | Methods, | Yes, a health economic analysis plan was developed for this study. | 1 |
| Study population | 5 | Describe characteristics of the study population (such as age range, demographics, socioeconomic, or clinical characteristics). | Methods, | Adult, women in intending pregnancy, pregnant women | 0.5 |
| Setting and location | 6 | Provide relevant contextual information that may influence findings. | Methods, modelling approach | The study conducted in sub-Saharan Africa | 1 |
| Comparators | 7 | Describe the interventions or strategies being compared and why chosen | Methods, policies compared, DALYs and net DALYs | Intervention was compared with tenofovir/lamivudine/efavirenz | 1 |
| Perspective | 8 | State the perspective(s) adopted by the study and why chosen | Methods, policies compared, DALYs and net DALYs | Healthcare perspective | 1 |
| Time horizon | 9 | State the time horizon for the study and why appropriate. | Methods, policies compared, DALYs and net DALYs | The study use 20 year time horizon | 1 |
| Discount rate | 10 | Report the discount rate(s) and reason chosen. | Methods, policies compared, DALYs and net DALYs | Discount rate 3% per annum | 1 |
| Selection of outcomes | 11 | Describe what outcomes were used as the measure(s) of benefit(s) and harm(s). | Methods, policies compared, DALYs and net DALYs | The outcomes were DALYs and net DALYs | 1 |
| Measurement of outcomes | 12 | Describe how outcomes used to capture benefit(s) and harm(s) were measured. | Methods, modelling | The study calculated DALYs for the entire adult population, considering extra DALYs per year for women with neural tube defects and mother-to-child transmission | 1 |
| Valuation of outcomes | 13 | Describe the population and methods used to measure and value outcomes. | Methods, model description paragraph 1 | Valuation of outcomes measured based on model, that generates a population individually tracked every 3 months. HIV are tracked in terms of viral load, CD4 cell count, occurrence of WHO stage 3 and 4 condition etc. | 0.5 |
| Measurement and valuation of resources and costs | 14 | Describe how costs were valued. | Methods, policies compared, DALYs and net DALYs | Net DALYs reflected the effect of a policy in the overall population burden of disease | 1 |
| Currency, price date, and conversion | 15 | Report the dates of the estimated resource quantities and unit costs, plus the currency and year of conversion. | Methods, model outcomes, appendix | Costs are in US$ | 0.5 |
| Rationale and description of model | 16 | If modelling is used, describe in detail and why used. Report if the model is publicly available and where it can be accessed. | Methods, model description, appendix | This modelling study used the HIV synthesis model | 1 |
| Analytics and assumptions | 17 | Describe any methods for analysing or statistically transforming data, any extrapolation methods, and approaches for validating any model used. | Methods, | The study conducted sensitivity analysis | 1 |
| Characterizing heterogeneity | 18 | Describe any methods used for estimating how the results of the study vary for sub-groups | Methods, | The study conducted sensitivity analysis | 1 |
| Characterizing distributional effects | 19 | Describe how impacts are distributed across different individuals or adjustments made to reflect priority populations | Methods, modelling approach paragraph 1, appendix | The study sampled from distribution of parameters relating to effect ART on HIV to create various epidemic setting scenarios , which reflect the diversity of epidemic and programmatic situations in sub-Saharan Africa | 1 |
| Characterizing uncertainty | 20 | Describe methods to characterize any sources of uncertainty in the analysis | Methods, | The study used sensitivity analysis to assessed robustness of the model and uncertainty | 0.5 |
| Approach to engagement with patients and others affected by the study | 21 | Describe any approaches to engage patients or service recipients, the general public, communities, or stakeholders (e.g., clinicians or payers) in the design of the study. | Methods, appendix | The provided information does not explicitly mention any engagement with patients, the general public, communities, or stakeholders in the design of the study. | n/a |
| **RESULTS** | | | | |  |
| Study parameters | 22 | Report all analytic inputs (e.g., values, ranges, references) including uncertainty or distributional assumptions. | Results, paragraph 2, table | All study parameters that describe in methods was complete discussed in results | 1 |
| Summary of main results | 23 | Report the mean values for the main categories of costs and outcomes of interest and summarise them in the most appropriate overall measure. | Results, paragraph 3, table 3 | The policy of ART initiation with tenofovir/lamivudine/dolutegravir in women intending pregnancy produced more health (DALY averted)  in 83% of setting scenario and was cost-effective | 0.5 |
| Effect of uncertainty | 24 | Describe how uncertainty about analytic judgments, inputs, or projections affect findings. Report the effect of choice of discount rate and time horizon, if applicable | Results, | The study described how uncertainty about analytic judgments, inputs, or projections could affect the findings. Sensitivity analyses were conducted to explore the impact of varying assumptions. | 1 |
| Effect of engagement with patients and others affected by the study | 25 | Report on any difference patient/service recipient, general public, community, or stakeholder involvement made to the approach or findings of the study | Not reported | n/a | n/a |
| **DISCUSSION** | | | | |  |
| Study findings, limitations, generalizability, and current knowledge | 26 | Report key findings, limitations, ethical or equity considerations not captured, and how these could impact patients, policy, or practice. | Discussion | The results of this study found that the policy if ART initiation with tenofovir/lamivudine/dolutegravir in women pregnancy is predicted to lead to more health life years and cos-effective than comparator. The limitation of these studies is that they are based on model design and assumptions. This research has been widely discussed and considered, but it cannot rule out the potential that other alternative assumptions have not been considered. | 1 |
| **OTHER RELEVANT INFORMATION** | | | | |  |
| Source of funding | 27 | Describe how the study was funded and any role of the funder in the identification, design, conduct, and reporting of the analysis | End of manuscript | RKG reports personal fees from Gilead Sciences and personal fees from  ViiV Healthcare, outside the submitted work. DH reports that Gilead  Sciences provides non-financial support (Truvada donation) for a  National Institutes of Health-funded study, outside the submitted work.  JM reports grants from the United States Agency for International  Development (USAID), during the conduct of the study; and personal  fees from University of Pittsburgh, Bristol-Myers Squibb, Gilead  Sciences, Janssen Pharmaceuticals, Merck, Xi’an Yufan Biotechnologies,  and Accelevir, grants from Gilead Sciences and Janssen  Pharmaceuticals, and share options from Cocrystal Pharma, outside the  submitted work. DRK reports research funding from Abbvie, consulting  honoraria from Gilead Sciences and Merck, research funding and  consulting honoraria from GlaxoSmithKline and ViiV Healthcare, and  speaking honoraria from Janssen. FV reports grants, personal fees, and  non-financial support from ViiV Healthcare and Gilead Sciences,  personal fees and non-financial support from Mylan and Roche,  personal fees from Adcock Ingram, Aspen Healthcare, Johnson &  Johnson, and Merck, and grants from the Bill & Melinda Gates  Foundation, Unitaid, USAID, and the South African Medical Research  Council, outside the submitted work. APo reports grants and personal  fees from ViiV Healthcare, Gilead Sciences, and Merck, outside the  submitted work, membership of WHO, European AIDS Clinical Society,  and British HIV Association guidelines committees, and is President of  the International Aids Society and Neat-id. AW reports grants from CLJI,  Gilead Sciences, Janssen, Merck, and ViiV Healthcare, financial support  from Virology Education (conference organiser), and non-financial  support from ARK Diagnostics. | 1 |
| Conflict of interest | 28 | Report authors conflicts of interest according to journal or International Committee of Medical Journal Editors requirements. | End of manuscript | All authors have no competing interest to declare | 1 |
